# Supplementary material
Source: publisher figshare collection journal article supplement (https://frontiersin.figshare.com/ndownloader/files/30896509)

Delta ancestry of trypanosome positive hybrids

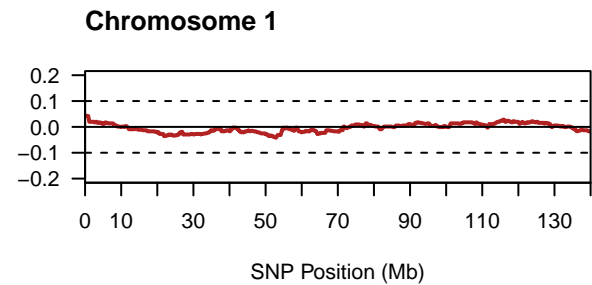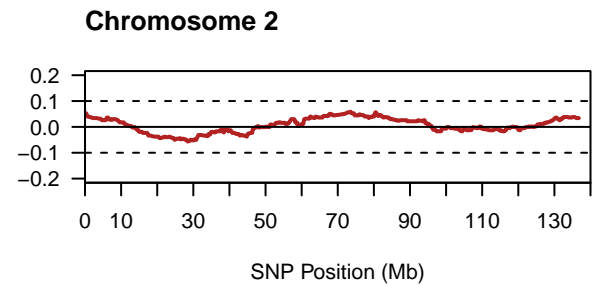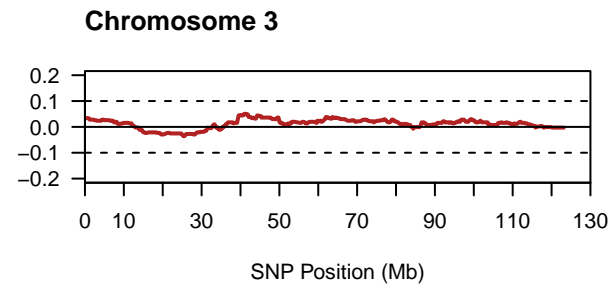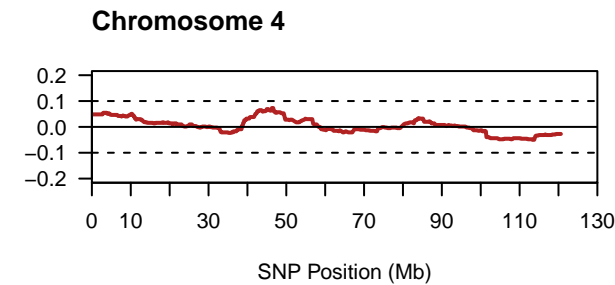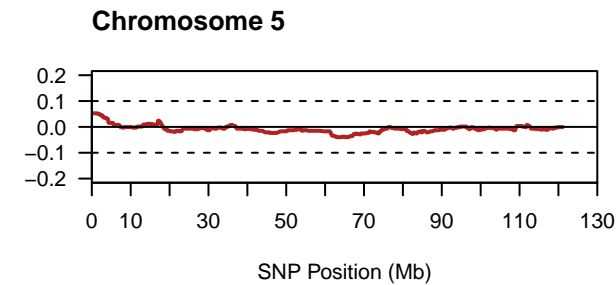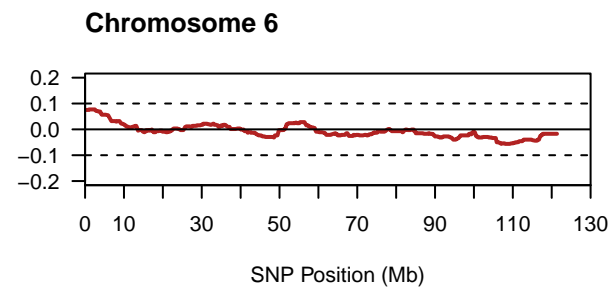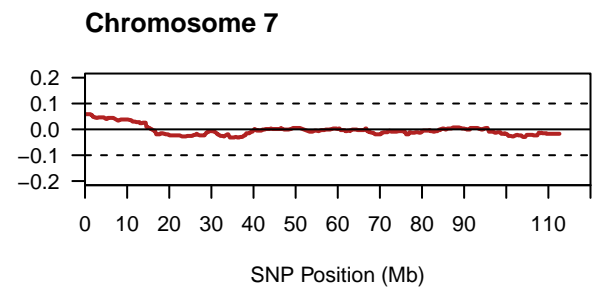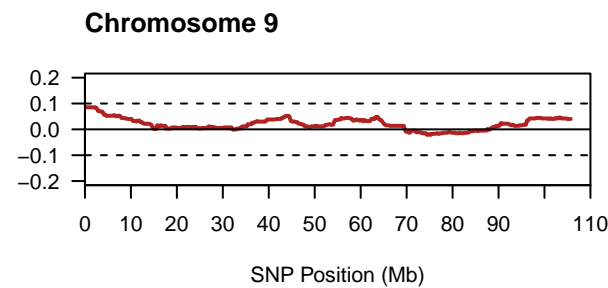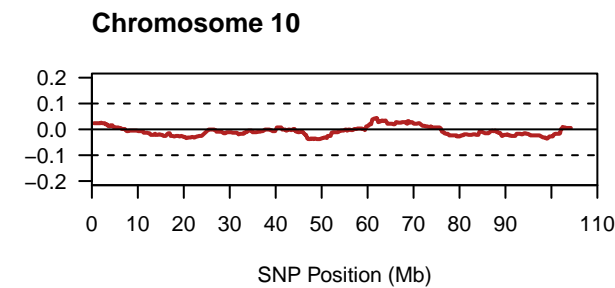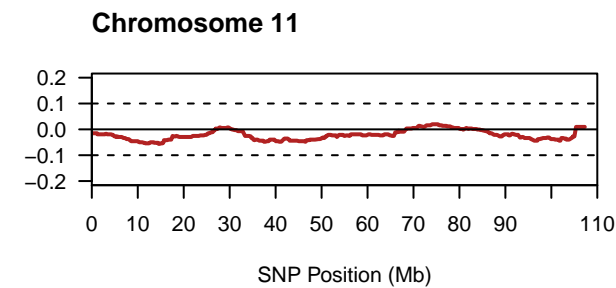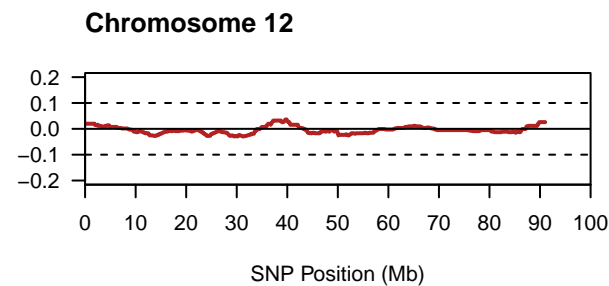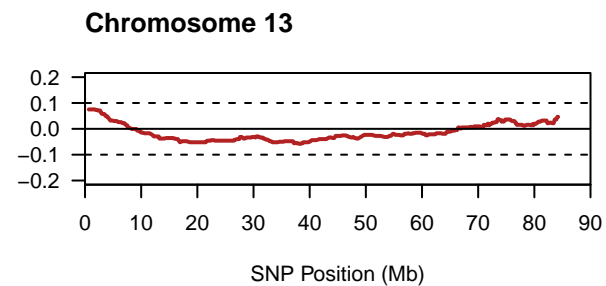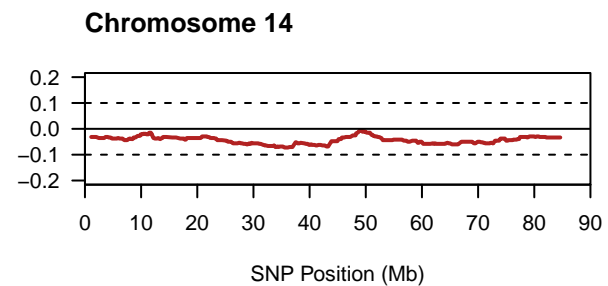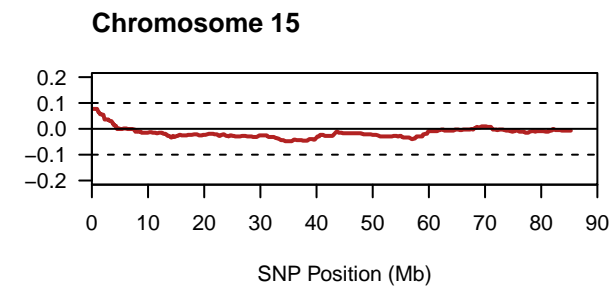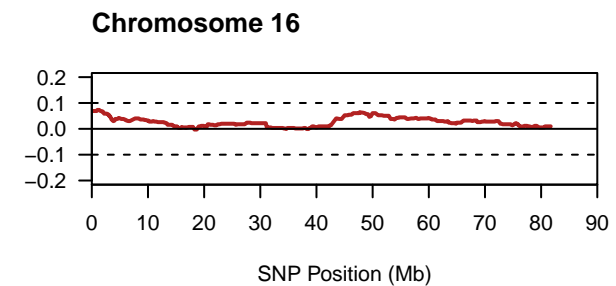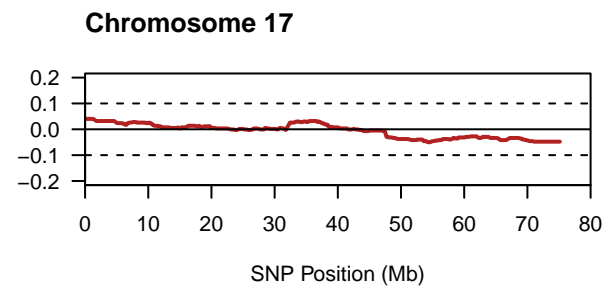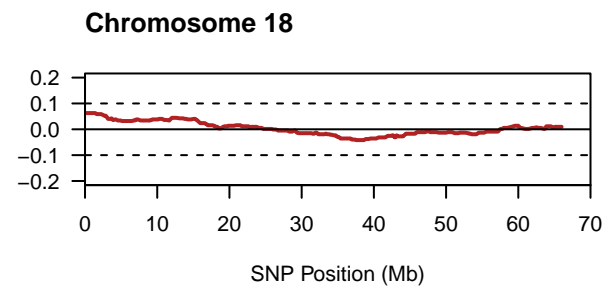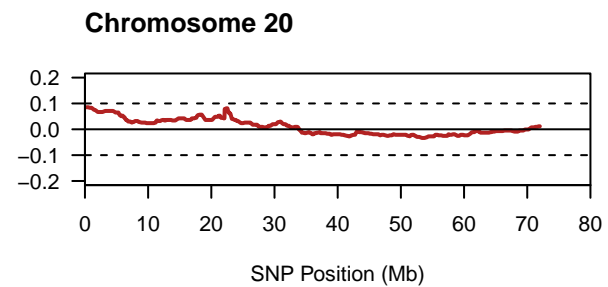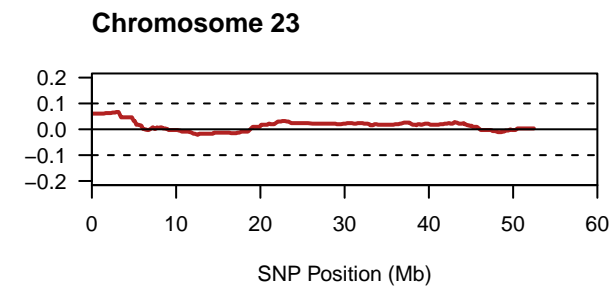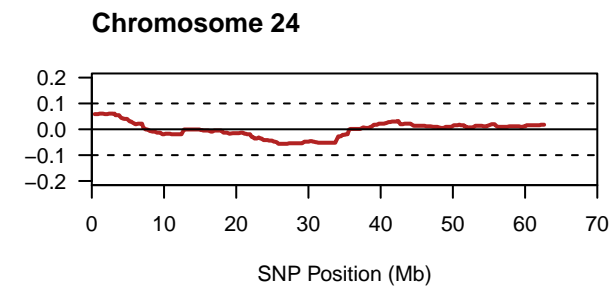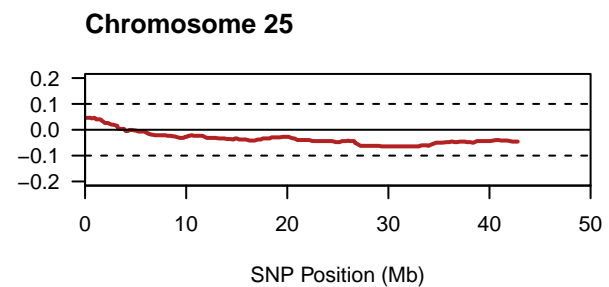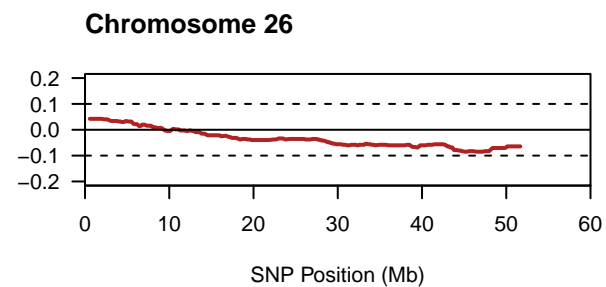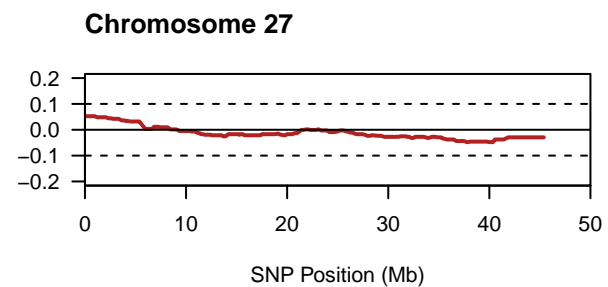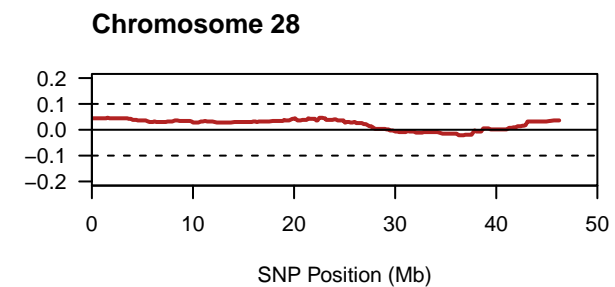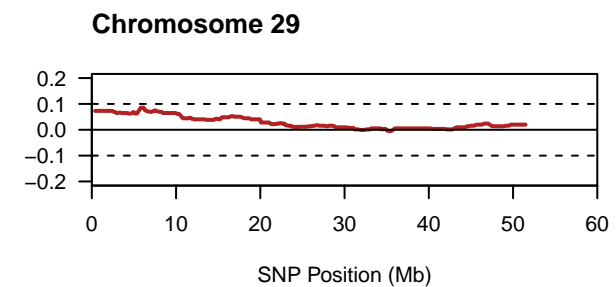

Supplement: Supplementary file [file 30896509]
